# Supplementary material
Source: PubMed Central journal article supplement (PMC4690779)

**Supplemental Table: EREFS scores at baseline and post-treatment, as stratified by baseline dilation status**

|                                | No dilation at baseline (n = 46) |                    |         | Dilation at baseline (n = 21) |                    |       |
|--------------------------------|----------------------------------|--------------------|---------|-------------------------------|--------------------|-------|
|                                | EoE baseline                     | EoE post-treatment | p*      | EoE baseline                  | EoE post-treatment | p*    |
| <b>EREFs scores</b>            |                                  |                    |         |                               |                    |       |
| <b>Exudates</b>                |                                  |                    |         |                               |                    |       |
| 0                              | 21 (46)                          | 36 (79)            | 0.004   | 13 (62)                       | 15 (71)            | 0.57  |
| 1                              | 14 (30)                          | 7 (15)             |         | 5 (24)                        | 5 (24)             |       |
| 2                              | 11 (24)                          | 3 (6)              |         | 3 (14)                        | 1 (5)              |       |
| Mean (±SD)                     | 0.78 ± 0.81                      | 0.28 ± 0.58        | < 0.001 | 0.52 ± 0.75                   | 0.33 ± 0.58        | 0.33  |
| <b>Rings</b>                   |                                  |                    |         |                               |                    |       |
| 0                              | 11 (24)                          | 27 (59)            | < 0.001 | 4 (19)                        | 4 (19)             | 0.04  |
| 1                              | 22 (48)                          | 17 (37)            |         | 5 (24)                        | 12 (57)            |       |
| 2                              | 13 (28)                          | 2 (4)              |         | 7 (33)                        | 5 (23)             |       |
| 3                              | 0 (0)                            | 0 (0)              |         | 5 (24)                        | 0 (0)              |       |
| Mean (±SD)                     | 1.04 ± 0.73                      | 0.46 ± 0.59        | < 0.001 | 1.62 ± 1.07                   | 1.05 ± 0.67        | 0.004 |
| <b>Edema</b>                   |                                  |                    |         |                               |                    |       |
| 0                              | 18 (39)                          | 36 (78)            | < 0.001 | 7 (33)                        | 12 (57)            | 0.12  |
| 1                              | 28 (61)                          | 10 (22)            |         | 14 (67)                       | 9 (43)             |       |
| Mean (±SD)                     | 0.61 ± 0.49                      | 0.22 ± 0.42        | < 0.001 | 0.67 ± 0.48                   | 0.43 ± 0.51        | 0.10  |
| <b>Furrows</b>                 |                                  |                    |         |                               |                    |       |
| 0                              | 5 (11)                           | 26 (57)            | < 0.001 | 2 (10)                        | 9 (42)             | 0.047 |
| 1                              | 32 (70)                          | 18 (39)            |         | 15 (71)                       | 10 (48)            |       |
| 2                              | 9 (19)                           | 2 (4)              |         | 4 (19)                        | 2 (10)             |       |
| Mean (±SD)                     | 1.09 ± 0.55                      | 0.48 ± 0.59        | < 0.001 | 1.09 ± 0.54                   | 0.67 ± 0.66        | 0.02  |
| <b>Stricture</b>               |                                  |                    |         |                               |                    |       |
| 0                              | 44 (96)                          | 39 (85)            | 0.08    | 7 (33)                        | 11 (52)            | 0.21  |
| 1                              | 2 (4)                            | 7 (15)             |         | 14 (67)                       | 10 (48)            |       |
| Mean (±SD)**                   | 0.04 ± 0.21                      | 0.15 ± 0.36        | 0.06    | 0.63 ± 0.49                   | 0.45 ± 0.51        | 0.26  |
| Stricture (mean mm ± SD)       | 13.3 ± 3.4                       | 14.6 ± 1.8         | --      | 8.9 ± 3.8                     | 12.1 ± 3.4         | 0.04  |
| Inflammatory score (mean ± SD) | 2.48 ± 1.44                      | 0.98 ± 1.18        | < 0.001 | 2.29 ± 1.38                   | 1.43 ± 1.36        | 0.03  |
| Fibrotic score (mean ± SD)     | 1.09 ± 0.78                      | 0.61 ± 0.74        | < 0.001 | 2.29 ± 1.27                   | 1.52 ± 0.87        | 0.006 |
| Total score (mean ± SD)        | 3.57 ± 1.88                      | 1.59 ± 1.45        | < 0.001 | 4.57 ± 2.42                   | 2.95 ± 2.01        | 0.01  |

\* Proportions are compared with chi-square; means are compared with a paired t-test

\*\* Too few paired data for a statistical comparison

## **Supplemental Figure Legend**

**Supplemental Figure 1.** Results of the iterative analysis for alternative weights for the EREFS score. Assessment of the association between a change in EREFS score and histologic response for all possible combinations of the EREFS score using **(A)** the eosinophil count as a continuous variable using Pearson correlation coefficients and **(B)** a threshold of 15 eos/hpf using odds ratio. Each line represents the association between change in EREFS score and change in eosinophil count at a given category weight. Categories that performed better with higher weights generally had an upward slope, while those that performed better with lower weights had a downward slope.

**Supplemental Figure 2.** Determination of change in the EREFS score from baseline (black bars) to post-treatment (gray bars) for a number of potential weighting schemes.

Supplemental Figure 1A

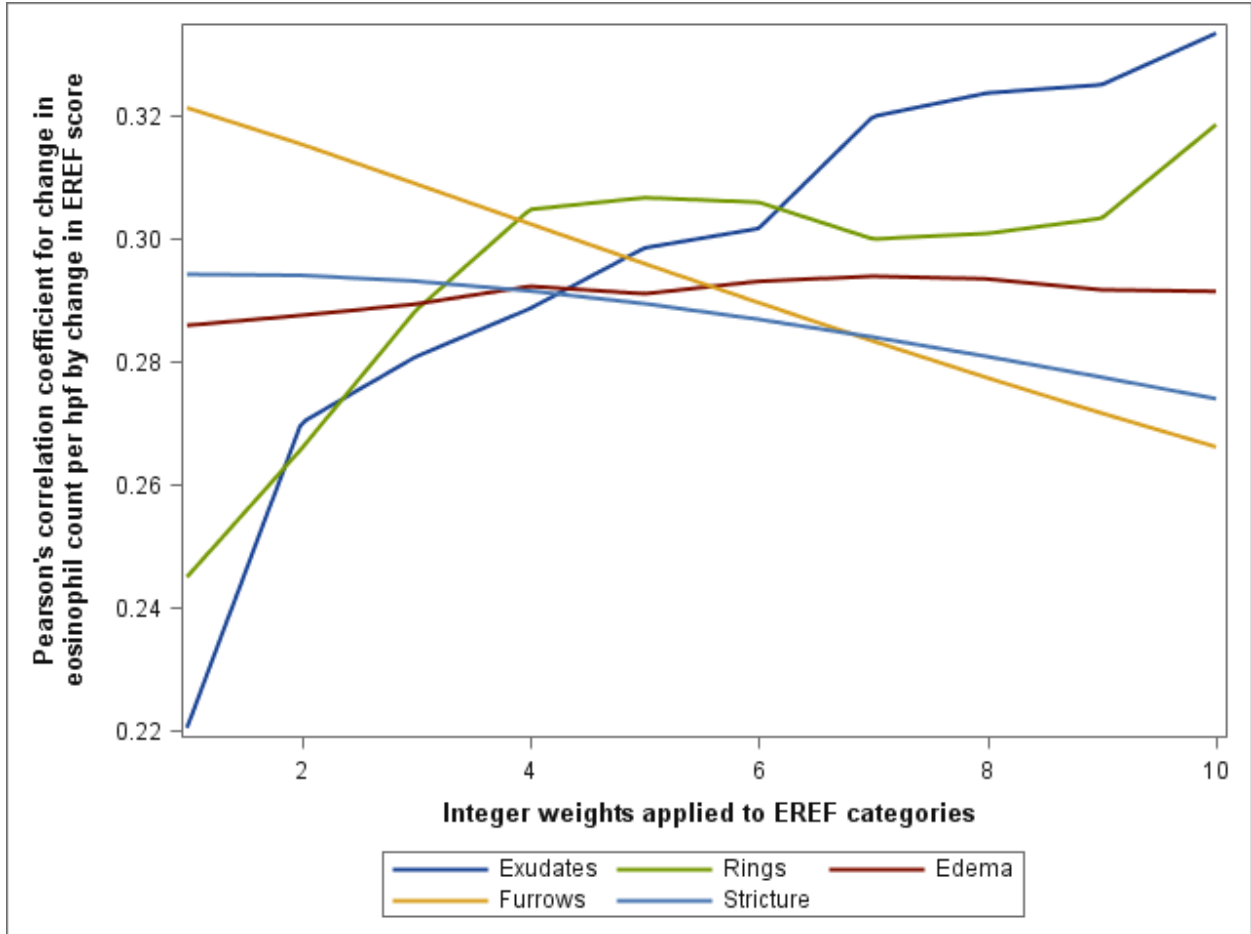

Supplemental Figure 1B

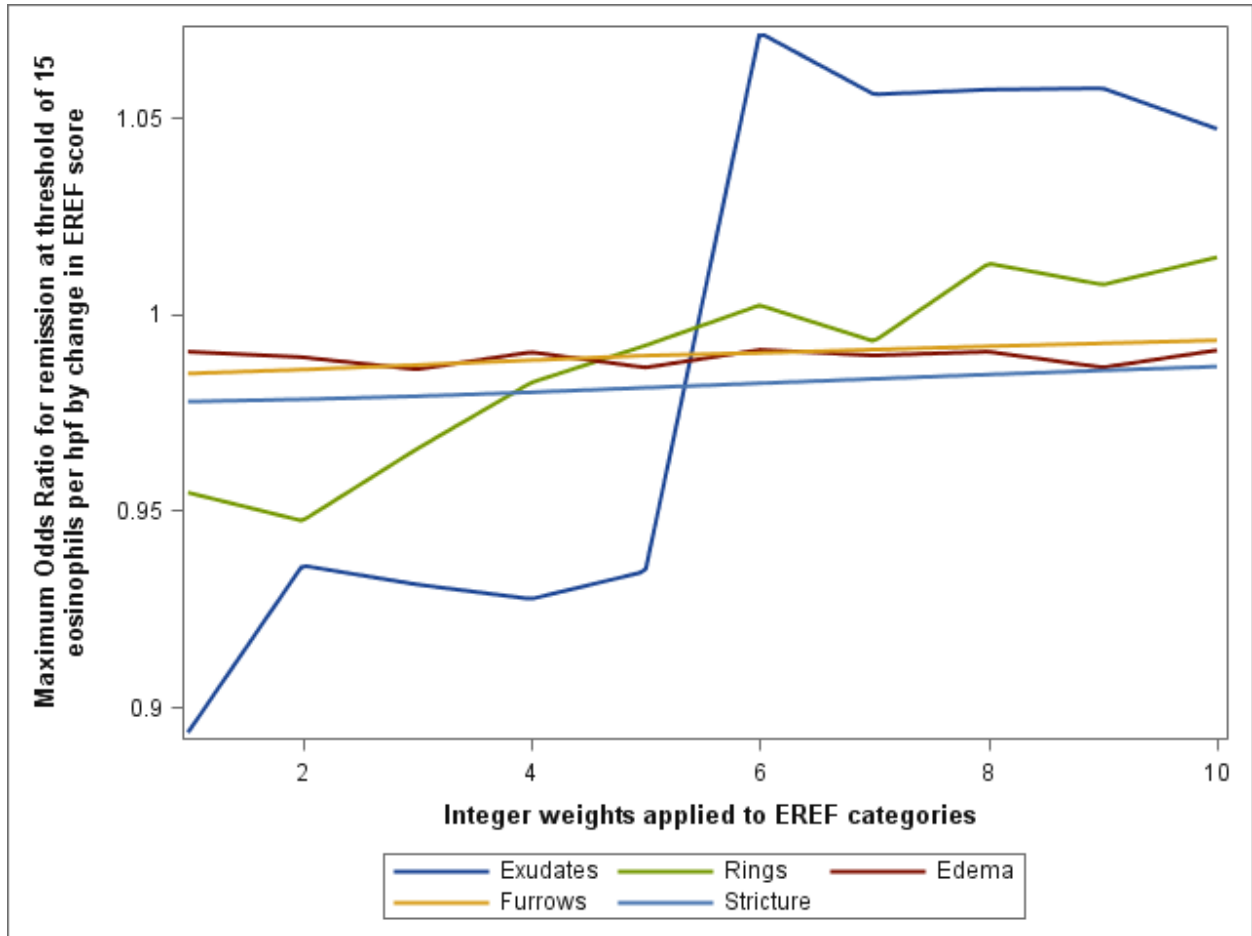

Supplemental Figure 2

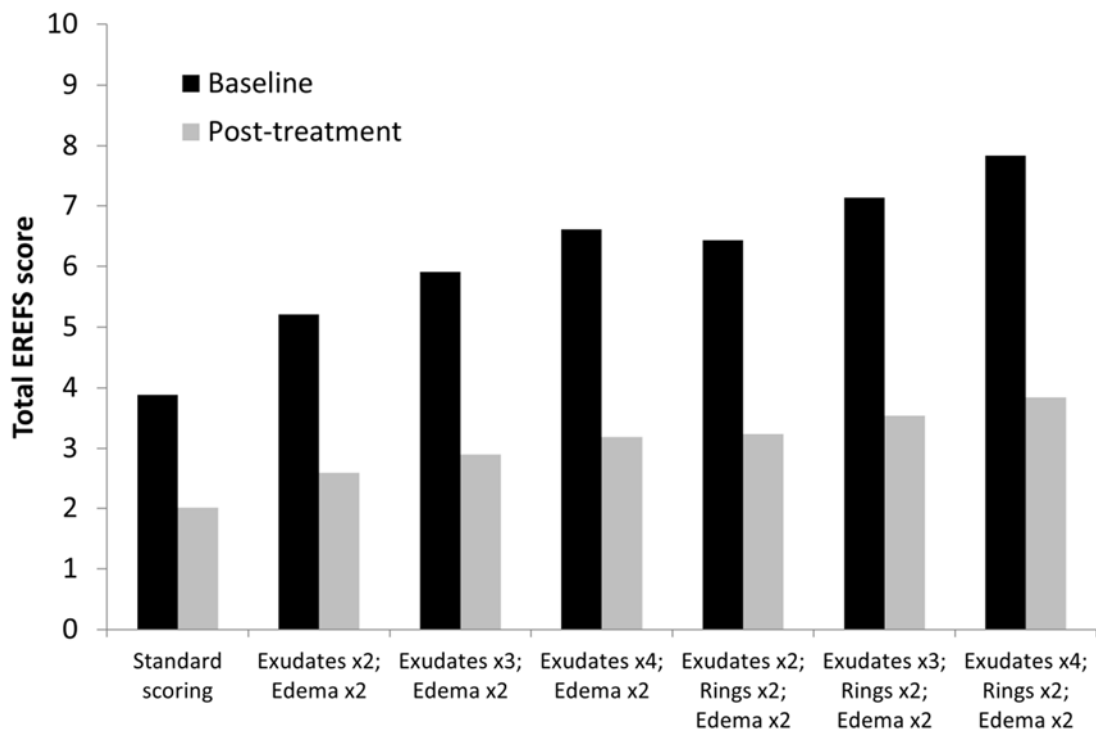

Supplement: NIHMS725116-supplement.pdf [file NIHMS725116-supplement.pdf]
